# Supplementary material for: High-Efficiency CRISPR/Cas9-Mediated Correction of a Homozygous Mutation in Achromatopsia-Patient-Derived iPSCs
Source: MDPI journal article supplement (doi:10.3390/ijms24043655), 2023-02-11
Supplement: s1 [file s1]

**Supplemental Material for:**

**High-efficiency CRISPR/Cas9-mediated correction of a homozygous mutation in achromatopsia-patient-derived iPSCs**

**Figure S1**

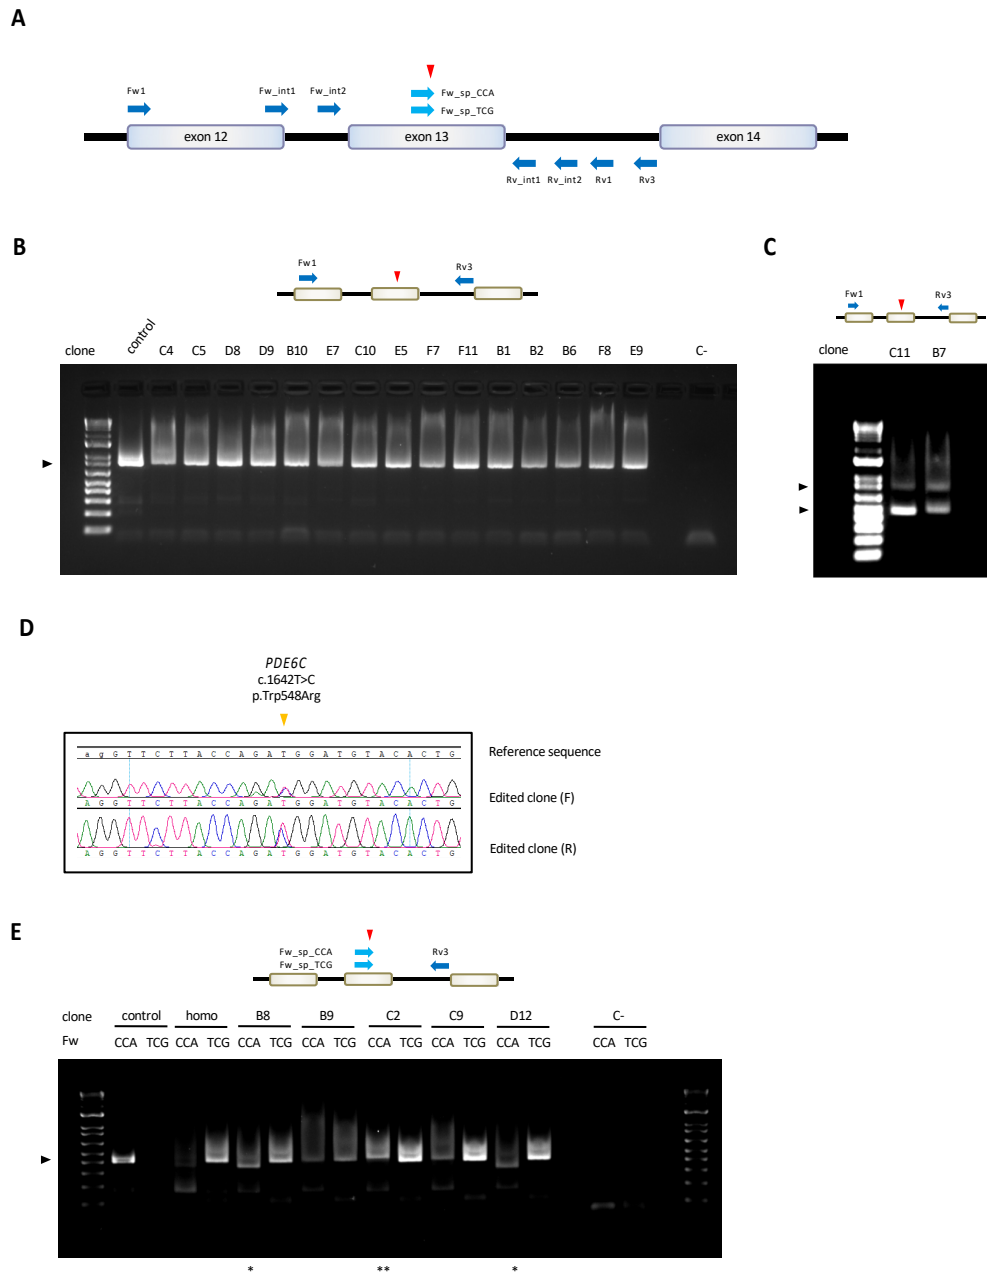

**Figure S1.** Identification of heterozygous on-target genomic defects in some edited clones but virtually not affecting PDE6C function. **(A)** Schematic representation of primers designed for genotyping *PDE6C* locus surrounding the c.1670G>A pathogenic variant. The forward primers appear above and below are the reverse ones. Primers sequences are detailed in Table S3. **(B)** Representative agarose gel of PCR products from one control and some homozygous edited clones amplified with Fw1 and Rv3 primers showing unique DNA band. **(C)** As in (B) but with the two hemizygous clones carrying the on-target deletion in one allele. **(D)** Sanger sequencing results of the edited clone displaying a single-nucleotide modification in heterozygosis. Nucleotide change is indicated in yellow. Sequencing was done with forward (F) and reverse (R) primers. **(E)** Heterozygous edited clones with on-target abnormalities were amplified with specific forward primers to identify the allele harboring the indels. PCR products from representative clones were run in a gel together with a control and homozygous edited clones (“homo”). “CCA” indicates PCR performed with the specific primer Fw\_sp\_CCA and “TCG” with specific primer Fw\_sp\_TCG. Asterisks depict clones with deletions (single asterisk) or insertions (double asterisk), according to band size compared with the wild-type.

**Figure S2**

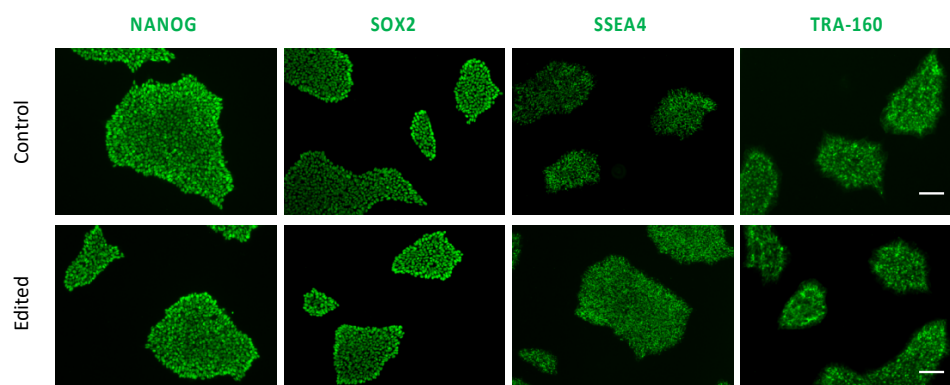

**Figure S2.** Single-nucleotide gene editing preserves hiPSCs pluripotency. Single staining pictures of Figure 4B, for the expression of NANOG, SOX2, SSEA4 and TRA-160. Scale bar represents 100  $\mu$ m.

**Table S1.** Off-targets list for each sgRNA.

| Off-target ID | DNA sequence             | Chromosome | Position  | Strand | Mismatches | Locus type               |
|---------------|--------------------------|------------|-----------|--------|------------|--------------------------|
| sgRNA1_OFFT1  | CTgACCACAATTaGgGGCATAGG  | chr1       | 110917468 | +      | 3          | Intergenic               |
| sgRNA2_OFFT1  | cTGGCGGCAcGGcTTCAACGTGG  | chr5       | 149895208 | -      | 3          | <i>PDE6A</i> exon 13     |
| sgRNA2_OFFT2  | TTGgAGGCATGaGTTCAcCGGGG  | chr12      | 132872780 | -      | 3          | <i>CHFR</i> intron 3     |
| sgRNA3_OFFT1  | TGAACCCgTGcTgCCcATTGTGG  | chr3       | 56079354  | -      | 3          | <i>ERC2</i> intron 7     |
| sgRNA3_OFFT2  | TGAAGCCgTGCCGCCAgTTGTGG  | chr5       | 149895214 | +      | 3          | <i>PDE6A</i> exon 13     |
| sgRNA3_OFFT3  | TGAACCCATGCCCGgCAATatGGG | chr19      | 46953664  | -      | 3          | <i>ARGGAP35</i> intron 3 |
| sgRNA4_OFFT1  | AATTGTGGTAAGTGAAcCaTGG   | chr3       | 15410656  | +      | 3          | <i>METTL6</i> intron 6   |
| sgRNA4_OFFT2  | AcTTGgGGTAAGgGACAGCTTGG  | chr3       | 79893056  | +      | 3          | Intergenic               |
| sgRNA4_OFFT3  | AAgaGTGGTAAGTGACAGCgAGG  | chr3       | 196287515 | -      | 3          | <i>PCYT1A</i> intron 1   |
| sgRNA4_OFFT4  | AAGTGaaGTAAGTGACAGCTAGG  | chr10      | 6563173   | +      | 3          | <i>PRKCQ</i> intron 1    |
| sgRNA4_OFFT5  | AAgTGTGGTgAGTGAgAGCTGGG  | chr11      | 66916128  | -      | 3          | <i>PC</i> intron 3       |
| sgRNA4_OFFT6  | AATTGTGGTAAGTGACAtaaAGG  | chr11      | 98091538  | +      | 3          | Intergenic               |
| sgRNA4_OFFT7  | AATTGTtTAAGTGACAGaTAGG   | chr12      | 66469809  | -      | 3          | <i>GRIP1</i> intron 7    |
| sgRNA4_OFFT8  | AAGTGTGGTcAGTtACAGCTTGG  | chr17      | 76789775  | -      | 3          | Intergenic               |
| sgRNA4_OFFT9  | AATTGTGGTAAtGTcACAGaTTGG | chr19      | 58192282  | +      | 3          | <i>ZNF274</i> intron 1   |
| sgRNA4_OFFT10 | AATTGTGGTAAGacAgAGCTAGG  | chrX       | 15101360  | -      | 3          | Intergenic               |

<sup>a</sup>Mismatched nucleotides are indicated in minus

<sup>b</sup>Off-targets analyzed by Sanger sequencing

**Table S2.** List of primers used for *PDE6C* genotyping.

| Primer ID | Location            | Sequence                | Distance from target (bp) |
|-----------|---------------------|-------------------------|---------------------------|
| Fw1       | exon 12             | CGAATTCGCTTCAGTGACTTC   | -382                      |
| Rv1       | intron 13           | CGGTGCTCAAGGATACTGGGAC  | +224                      |
| Fw_int1   | exon 12 + intron 12 | GAAATTCAAAGTACCTGTAGAGG | -295                      |
| Rv_int1   | intron 13           | CATACCTATTTCTCATCATGCTC | +194                      |
| Fw_int2   | intron 12           | TGTGGCTCTGCTTCACTGATG   | -237                      |
| Rv_int2   | intron 13           | AGCGGAGAGGGGTTTGTGC     | +140                      |
| Rv3       | intron 13           | ACCTCTATACCAAGTGCAGCC   | +379                      |
| Fw_sp_CCA | exon 13             | CACTGTGAGGAAAGGGTACCA   | -21                       |
| Fw_sp_TCG | exon 13             | CACTGTGAGGAAAGGGTATCG   | -21                       |

**Table S3.** List of primers used for genotyping.

| Gene   | Primer Forward                 | Primer Reverse                 |
|--------|--------------------------------|--------------------------------|
| HTR2A  | AGAAAATTACACAGCAATAAAATATAGCGG | CCAATATTAATATGTAGCAAAAAGAGGGAG |
| HPRT   | ACATCAGCAGCTGTTCTG             | GGCTGAAAGGAGAGAACT             |
| OFFT#1 | AACCCAAGAGGCGGAGACTG           | TCCACCTTCCAGGCTCAAGC           |
| OFFT#3 | ACTACTGTGTCAGGAGTCGTG          | AGTGCCGTCCGAGCCCCG             |
| OFFT#4 | AGTAGAGCTCAGTCATAGTAGG         | TTCAAGGTGGGCTTCCTTGG           |
| OFFT#5 | AGGAGGTGAAGACCAGCCTG           | AATAGCCACTGCCTCTTTCGG          |
| OFFT#7 | TTCTGGTCTGTGTGATGGAGG          | TAGCAAGATTCTATCATAGTAAGG       |
| OFFT#9 | AGACAGCTTCTAGGCATGGAG          | ACTCACCTAGGTCCACTGAG           |
